# Supplementary material for: 5-hydroxymethylcytosine marks promoters in colon that resist DNA hypermethylation in cancer
Source: PubMed Central journal article supplement (PMC4380107; doi:10.1186/s13059-015-0605-5), 2015-04-01

Uribe-Lewis\_Additional file 9\_Supplementary Fig. 8.

**a**

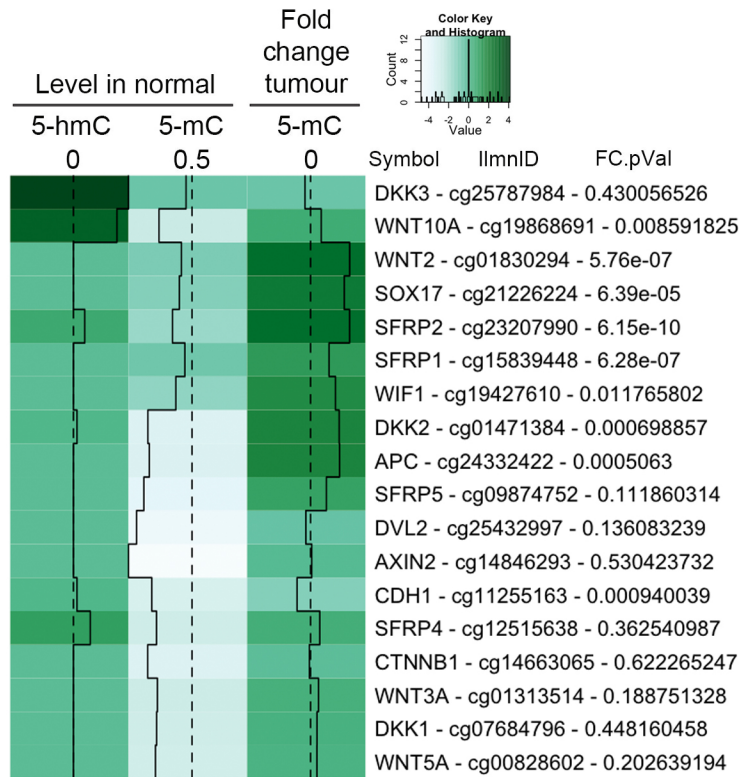

**b**

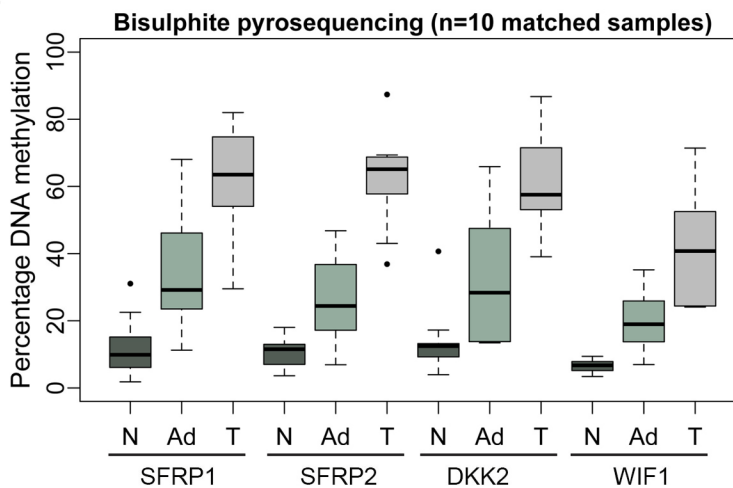

Supplement: 13059_2015_605_MOESM9_ESM.pdf [file 13059_2015_605_MOESM9_ESM.pdf]
